# Supplementary material for: Comment on “Lewis acid-surfactant complex catalysed polymerisation in aqueous dispersed media: cationic or radical polymerisation?” by A. Destephen, L. Lezama and N. Ballard, Polym. Chem., 2020, 11, 5757
Source: Royal Society of Chemistry journal article supplement (doi:10.1039/d3py00661a), 2024-01-01
Supplement: d3py00661a1.pdf [file d3py00661a1.pdf]

## Supporting information for

Comment on “Lewis acid-surfactant complex catalysed polymerisation in aqueous dispersed media: cationic or radical polymerisation?” by A. Destephen, L. Lezama and N. Ballard, *Polym. Chem.*, 2020, 11, 5757

By Irina V. Vasilenko, François Ganachaud and Sergei V. Kostjuk

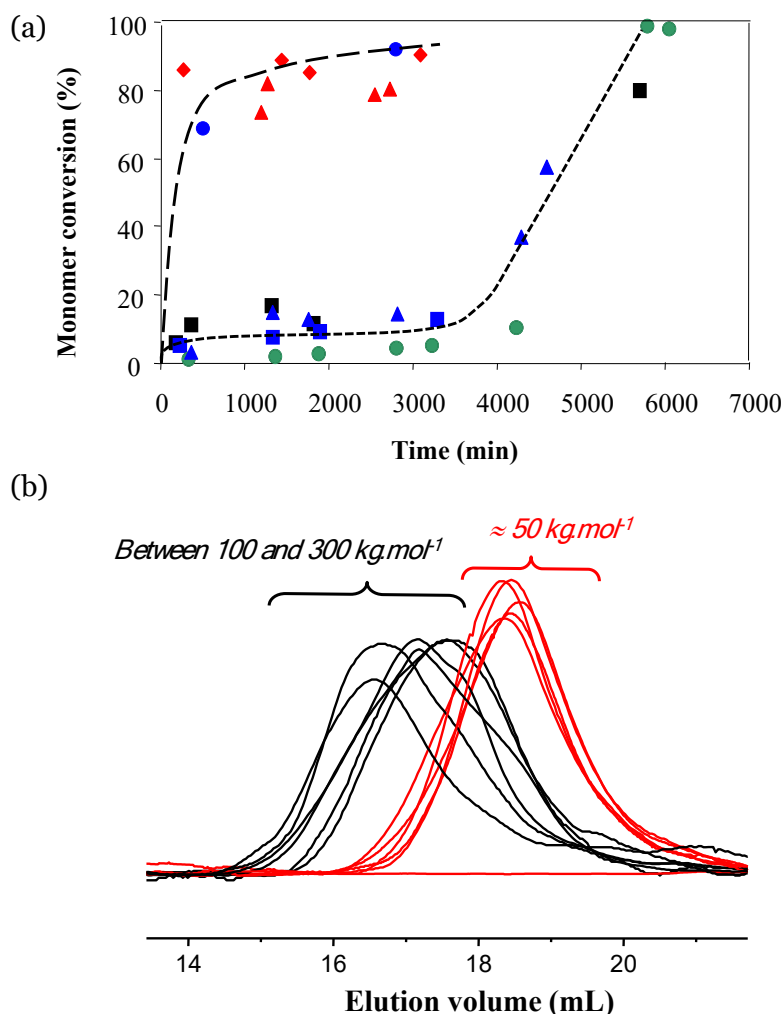

**Fig. S1:** a) Unpublished results of different runs of pMOS polymerisation with Disponil-based LASC at 60°C (from ref. 11 in the main text). Different catalyst contents were used here. Conditions of polymerisation: pMOS = 1.8 g; H<sub>2</sub>O = 3 g; 60°C; Surfactant/pMOS = 22wt%. Content of YbOTf<sub>3</sub> (in mol% compared to pMOS) in different runs :  $\bullet$ , 1.3%,  $\circ$ , 7%,  $\blacktriangle$ , 2.5%,  $\triangle$ , 7.5%,  $\circ$ , 10%. Radical polymerization (long dash line — —) is fast and not complete, whereas cationic polymerization (short dash line - - -) proceeds first by the generation of low content of oligomers and after a consequent inhibition time, polymer formation. One sees random polymerization process in absence of PCP, e.g. here in the case of 2.5% catalyst (compare blue circles to the other two blue symbols). Lines are only guides for the eye; b) SEC traces of experiments done in same conditions than above with 10 mol% YbOTf<sub>3</sub>. One sees two types of distribution, the black one assigned to radical polymerisation and the red one, more monodisperse, assigned to cationic polymerisation.

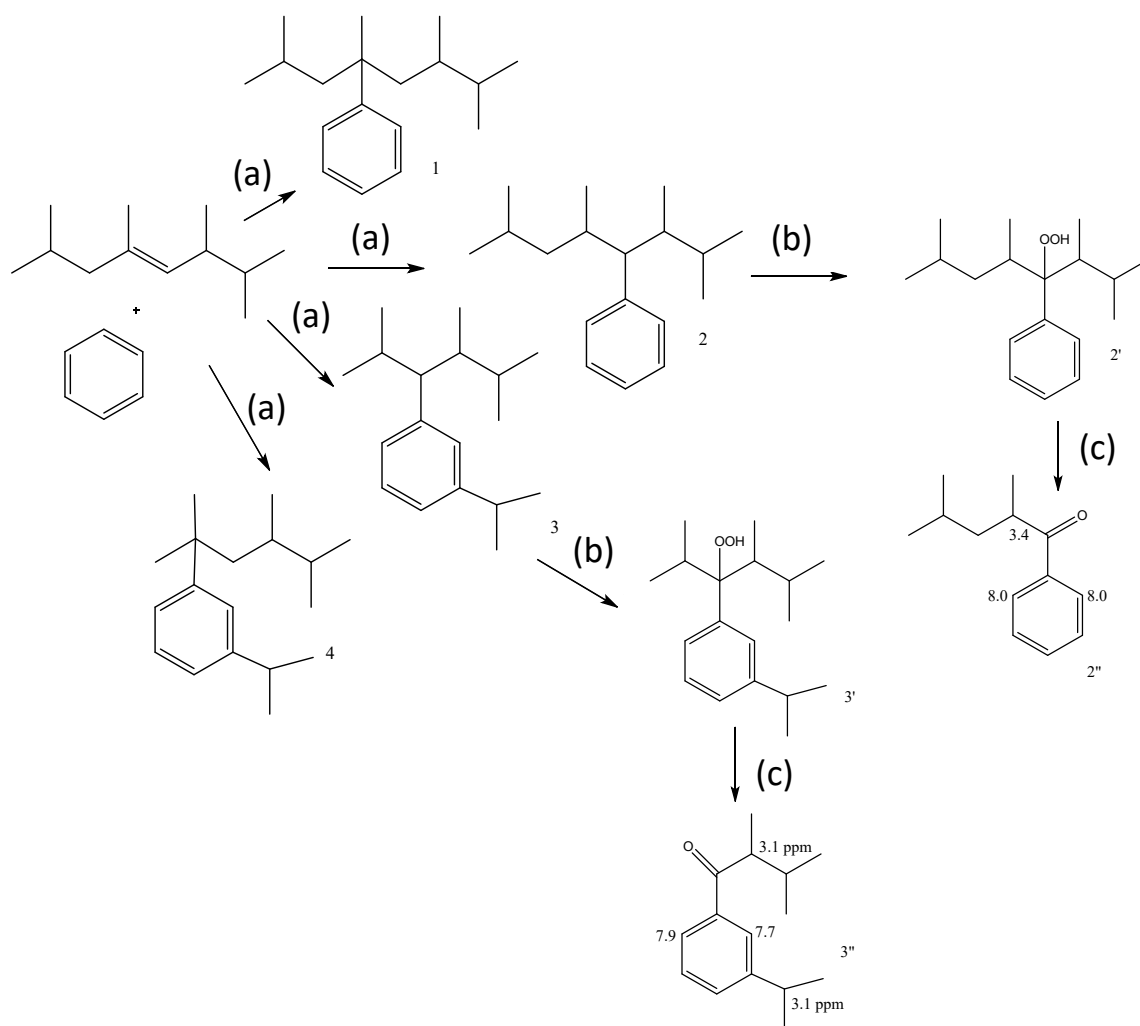

**Fig. S2.** (a) First step of the synthesis of DBSNa, where different isomers of branched alkylbenzene intermediates are generated before further sulfonation; (b) proposed oxidation of R-CH-Ph bond of alkylbenzene isomers **2** and **3** by  $O_2$  to o-hydroperoxides at  $\alpha$ -position to the aromatic ring; (c) further transformation to ketones by decomposition of the primarily formed hydroperoxides. Indicated are calculated chemical shift for **2''** and **3''** using ChemDraw.

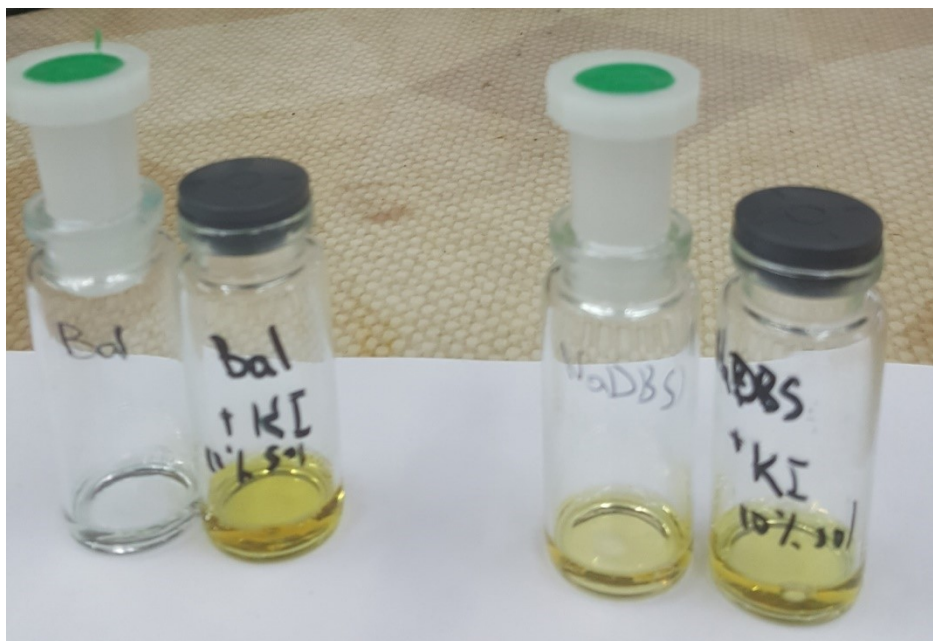

**Fig. S3.** Qualitative reaction for peroxides. Solutions of Ballard surfactant (left) and our surfactant (right) mixed with 10 % solution of KI. Green lids: original solution, black lids: after KI reaction.

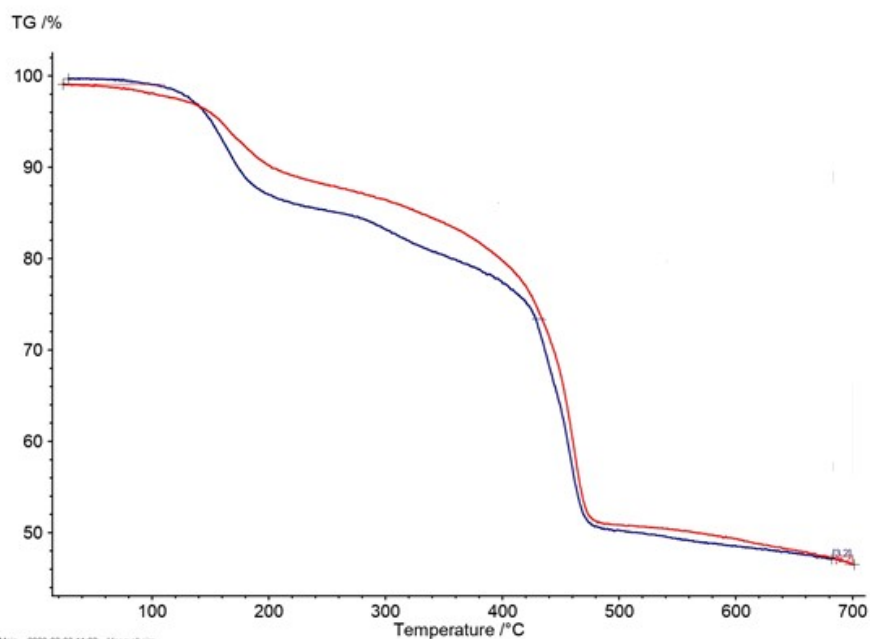

**Fig S4.** TGA measurements of our DBSNa (in red) and Ballard's DBSNa (in blue). Note that the TGA residue of about 46.5 % and 47.1% for our DBSNa and DBSNa (Ballard), respectively seen here is expected from the decomposition of DBSNa into infusible  $\text{Na}_2\text{SO}_4$ .

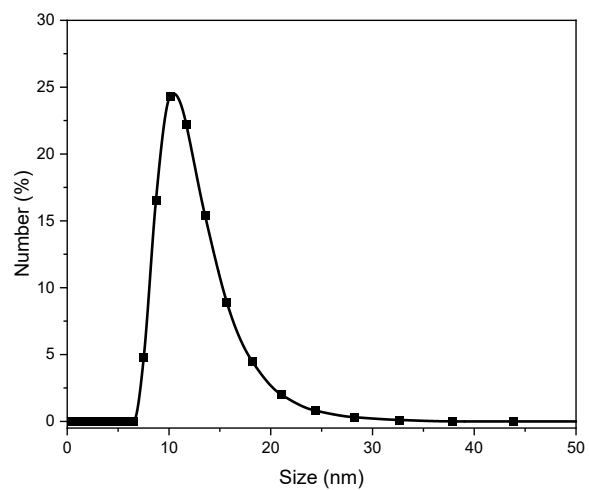

**Fig. S5.** Typical DLS size distribution of water-soluble micellized LASC prepared from DBSNa ( $d_z = 11.9$  nm).
